# Supplementary material for: Prehospital diagnostic algorithm for acute coronary syndrome using machine learning: a prospective observational study
Source: PubMed Central journal article supplement (PMC9418242; doi:10.1038/s41598-022-18650-6), 2022-08-26
Supplement: 41598_2022_18650_MOESM1_ESM.pdf [file 41598_2022_18650_MOESM1_ESM.pdf]

## **Supplementary Material for**

### **Prehospital diagnostic algorithm for acute coronary syndrome using machine learning: a prospective observational study**

#### **Information**

**Supplementary Table S1.** Baseline characteristics and clinical outcomes of the external cohort

**Supplementary Table S2.** Prehospital diagnostic algorithms for acute coronary syndrome using 17 features

**Supplementary Table S3.** Prehospital diagnostic algorithms for acute myocardial infarction using 17 features

**Supplementary Table S4.** Prehospital diagnostic algorithms for ST-segment elevation myocardial infarction using 17 features

**Supplementary Table S5.** Collected features

**Supplementary Table S6.** Interviews of symptoms

**Supplementary Figure S1.** Relationship between the number of features and accuracy, sensitivity, specificity, F1-score, positive predictive values and negative predictive values for the prediction algorithm

**Supplementary Figure S2.** Comparison of test score of area under the receiver operating characteristic curve using XGBoost with 17 and 43 features

**Supplementary Figure S3.** SHAP value of the prehospital diagnostic algorithm for acute coronary syndrome using 43 features

**Supplementary Figure S4.** Study flowchart

**Supplementary Note S1.** Contribution of timing and meteorological factors to the onset of acute coronary syndrome

## Supplementary Note S2. Model evaluation strategy

**Supplementary Table S1. Baseline characteristics and clinical outcomes of the external cohort**

|                                                    | ACS (n=29)       | Non-ACS (n=32)   | P value |
|----------------------------------------------------|------------------|------------------|---------|
| Age, years                                         | 69 (57-18)       | 79.5 (67-86)     | 0.049   |
| Male sex, n (%)                                    | 20 (69.0)        | 19 (59.4)        | 0.436   |
| Past medical history                               |                  |                  |         |
| Diabetes mellitus, n (%)                           | 14 (48.3)        | 5 (15.6)         | 0.006   |
| Hypertension, n (%)                                | 12 (41.4)        | 9 (28.1)         | 0.277   |
| Dyslipidemia, n (%)                                | 1 (3.5)          | 0 (0.0)          | 0.290   |
| Stable angina, n (%)                               | 4 (13.8)         | 7 (21.9)         | 0.412   |
| Old myocardial infarction, n (%)                   | 3 (10.3)         | 5 (15.6)         | 0.542   |
| Prior PCI, n (%)                                   | 3 (10.3)         | 6 (18.8)         | 0.355   |
| Prior CABG, n (%)                                  | 0 (0.0)          | 0 (0.0)          |         |
| Intracranial hemorrhage n (%)                      | 0 (0.0)          | 0 (0.0)          |         |
| Cerebral infarction, n (%)                         | 2 (6.9)          | 2 (6.3)          | 0.919   |
| Prior antiplatelet or anticoagulant therapy, n (%) | 1 (3.5)          | 5 (15.6)         | 0.111   |
| Vital signs                                        |                  |                  |         |
| Heart rate (beats/min)                             | 76 (64-90)       | 96.5 (78-122)    | 0.004   |
| Systolic blood pressure (mmHg)                     | 140 (119-155)    | 160 (134-181)    | 0.034   |
| Diastolic blood pressure (mmHg)                    | 87 (71-100)      | 90 (71-106)      | 0.573   |
| Body temperature (°C)                              | 36.3 (35.8-36.8) | 36.4 (36.0-36.6) | 0.623   |
| Blood oxygen saturation (%)                        | 99 (96-99)       | 97 (91-99)       | 0.007   |
| Respiratory rate (times/min)                       | 24 (18-24)       | 24 (18-24)       | 0.662   |
| Japan Coma Scale=0, n (%)                          | 25 (86.2)        | 27 (84.4)        | 0.840   |
| Oxygen therapy, n (%)                              | 11 (37.9)        | 9 (28.1)         | 0.415   |
| ECG monitoring                                     |                  |                  |         |
| ST elevation, n (%)                                | 14 (48.3)        | 1 (3.1)          | <0.001  |
| ST depression, n (%)                               | 8 (27.6)         | 12 (37.5)        | 0.410   |
| ST change, n (%)                                   | 22 (75.9)        | 13 (40.6)        | 0.005   |
| Arrhythmia, n (%)                                  | 3 (10.3)         | 9 (28.1)         | 0.001   |
| Symptoms                                           |                  |                  |         |
| 1. Cold hands, n (%)                               | 8(27.6)          | 5 (15.6)         | 0.255   |
| 2. Hand moistening, n (%)                          | 8 (27.6)         | 7 (21.9)         | 0.605   |
| 3. Dyspnea, n (%)                                  | 2 (6.9)          | 2 (6.3)          | 0.919   |
| 4. Palpitations, n (%)                             | 3 (10.3)         | 7 (21.9)         | 0.224   |
| 5. Throbbing pain, n (%)                           | 7 (24.1)         | 7 (21.9)         | 0.834   |
| 6. Sharp/stabbing pain, n (%)                      | 1 (3.5)          | 1 (3.1)          | 0.944   |
| 7. Positional chest pain, n (%)                    | 3 (10.3)         | 4 (12.5)         | 0.792   |
| 8. Reproduction of chest pain by palpation, n (%)  | 0 (0.0)          | 1 (3.1)          | 0.337   |
| 9. Chest pain with breathing or cough, n (%)       | 1 (3.5)          | 2 (6.3)          | 0.613   |
| 10. Pressing pain, n (%)                           | 22 (75.9)        | 17 (53.1)        | 0.065   |
| 11. Nausea or vomiting, n (%)                      | 8 (27.6)         | 4 (12.5)         | 0.139   |
| 12. Cold sweat, n (%)                              | 14 (48.3)        | 11 (34.4)        | 0.270   |
| 13. Pain radiating to jaw or shoulder, n (%)       | 6 (20.7)         | 3 (9.4)          | 0.213   |
| 14. Similarity to previous ischemic episode, n (%) | 4 (13.8)         | 5 (15.6)         | 0.840   |
| 15. Chest pain aggravated by walk, n (%)           | 4 (13.8)         | 2 (6.3)          | 0.323   |
| 16. Worsening pain, n (%)                          | 8 (27.6)         | 10 (31.3)        | 0.754   |

|                                           |           |             |       |
|-------------------------------------------|-----------|-------------|-------|
| 17. Pain at rest, n (%)                   | 23 (79.3) | 26 (81.3)   | 0.849 |
| 18. Persistent pain, n (%)                | 27 (93.1) | 29 (90.6)   | 0.725 |
| 19. Recurrent pain within 24 hours, n (%) | 6 (20.7)  | 5 (15.6)    | 0.607 |
| 20. Chronic pain, n (%)                   | 4 (13.8)  | 2 (6.3)     | 0.323 |
| 21. Pain severity (10-point scale)        | 5 (0-7)   | 0 (0.5-6.5) | 0.541 |

Data are presented as median and interquartile range for continuous features.

*P*-values were calculated using Pearson's chi-square test or Mann–Whitney U test.

CABG (coronary artery bypass grafting), ECG (electrocardiogram), PCI (percutaneous coronary intervention)

**Supplementary Table S2. Prehospital diagnostic algorithms for acute coronary syndrome using 17 features**

| Models                       | AUC   | Accuracy | Sensitivity | Specificity | F1-score | PPV   | NPV   |
|------------------------------|-------|----------|-------------|-------------|----------|-------|-------|
| <b>Training score</b>        |       |          |             |             |          |       |       |
| XGBoost                      | 0.881 | 0.814    | 0.795       | 0.824       | 0.747    | 0.709 | 0.885 |
| Logistic regression          | 0.880 | 0.818    | 0.784       | 0.836       | 0.748    | 0.722 | 0.881 |
| Random forest                | 0.924 | 0.858    | 0.842       | 0.867       | 0.805    | 0.773 | 0.912 |
| SVM (Linear)                 | 0.882 | 0.812    | 0.800       | 0.819       | 0.747    | 0.704 | 0.886 |
| SVM (radial basis function)  | 0.879 | 0.809    | 0.814       | 0.807       | 0.747    | 0.691 | 0.892 |
| MLP                          | 0.889 | 0.826    | 0.794       | 0.843       | 0.759    | 0.733 | 0.887 |
| LDA                          | 0.880 | 0.800    | 0.838       | 0.780       | 0.744    | 0.670 | 0.901 |
| LGBM                         | 0.916 | 0.840    | 0.855       | 0.833       | 0.788    | 0.732 | 0.916 |
| Voting                       | 0.894 | 0.811    | 0.845       | 0.793       | 0.756    | 0.685 | 0.907 |
| <b>Test score</b>            |       |          |             |             |          |       |       |
| XGBoost                      | 0.859 | 0.810    | 0.749       | 0.842       | 0.731    | 0.723 | 0.866 |
| Random forest                | 0.853 | 0.802    | 0.766       | 0.821       | 0.727    | 0.700 | 0.871 |
| Logistic regression          | 0.859 | 0.805    | 0.782       | 0.818       | 0.737    | 0.708 | 0.879 |
| SVM (Linear)                 | 0.858 | 0.800    | 0.782       | 0.810       | 0.731    | 0.696 | 0.878 |
| SVM (radial basis function)  | 0.864 | 0.804    | 0.782       | 0.816       | 0.737    | 0.708 | 0.877 |
| MLP                          | 0.859 | 0.820    | 0.746       | 0.859       | 0.743    | 0.759 | 0.869 |
| LDA                          | 0.860 | 0.814    | 0.772       | 0.838       | 0.741    | 0.724 | 0.878 |
| LGBM                         | 0.836 | 0.778    | 0.772       | 0.783       | 0.711    | 0.671 | 0.866 |
| Voting                       | 0.864 | 0.807    | 0.783       | 0.821       | 0.739    | 0.718 | 0.881 |
| <b>External cohort score</b> |       |          |             |             |          |       |       |
| XGBoost                      | 0.806 | 0.726    | 0.655       | 0.788       | 0.691    | 0.731 | 0.722 |
| Random forest                | 0.804 | 0.726    | 0.759       | 0.697       | 0.721    | 0.688 | 0.767 |
| Logistic regression          | 0.809 | 0.758    | 0.552       | 0.939       | 0.681    | 0.889 | 0.705 |
| SVM (Linear)                 | 0.815 | 0.726    | 0.655       | 0.788       | 0.691    | 0.731 | 0.722 |
| SVM (radial basis function)  | 0.832 | 0.774    | 0.793       | 0.758       | 0.767    | 0.742 | 0.806 |
| MLP                          | 0.809 | 0.726    | 0.759       | 0.697       | 0.721    | 0.688 | 0.767 |
| LDA                          | 0.822 | 0.726    | 0.759       | 0.697       | 0.721    | 0.688 | 0.767 |
| LGBM                         | 0.785 | 0.710    | 0.759       | 0.667       | 0.710    | 0.667 | 0.759 |
| Voting                       | 0.810 | 0.742    | 0.828       | 0.667       | 0.750    | 0.686 | 0.815 |

AUC (area under the receiver operating characteristic curve), LDA (linear discriminant analysis), LGBM (light gradient boosting machine), MLP (multilayer perceptron), NPV (negative predictive values), PPV (positive predictive values), SVM (support vector machine), XGBoost (eXtreme Gradient Boosting)

**Supplementary Table S3. Prehospital diagnostic algorithms for acute myocardial infarction using 17 features**

| Models                       | AUC   | Accuracy | Sensitivity | Specificity | F1-score | PPV   | NPV   |
|------------------------------|-------|----------|-------------|-------------|----------|-------|-------|
| <b>Training score</b>        |       |          |             |             |          |       |       |
| XGBoost                      | 0.872 | 0.811    | 0.775       | 0.827       | 0.724    | 0.684 | 0.888 |
| Logistic regression          | 0.870 | 0.800    | 0.798       | 0.801       | 0.719    | 0.657 | 0.896 |
| Random forest                | 0.901 | 0.828    | 0.838       | 0.824       | 0.758    | 0.694 | 0.916 |
| SVM (Linear)                 | 0.869 | 0.790    | 0.815       | 0.778       | 0.712    | 0.635 | 0.901 |
| SVM (radial basis function)  | 0.871 | 0.798    | 0.807       | 0.793       | 0.718    | 0.648 | 0.898 |
| MLP                          | 0.875 | 0.812    | 0.783       | 0.825       | 0.727    | 0.684 | 0.892 |
| LDA                          | 0.867 | 0.791    | 0.815       | 0.779       | 0.713    | 0.636 | 0.901 |
| LGBM                         | 0.895 | 0.821    | 0.832       | 0.816       | 0.749    | 0.685 | 0.913 |
| Voting                       | 0.879 | 0.793    | 0.847       | 0.767       | 0.723    | 0.631 | 0.915 |
| <b>Test score</b>            |       |          |             |             |          |       |       |
| XGBoost                      | 0.841 | 0.796    | 0.745       | 0.820       | 0.705    | 0.683 | 0.873 |
| Random forest                | 0.845 | 0.796    | 0.768       | 0.810       | 0.713    | 0.686 | 0.882 |
| Logistic regression          | 0.845 | 0.784    | 0.774       | 0.789       | 0.700    | 0.657 | 0.884 |
| SVM (Linear)                 | 0.850 | 0.796    | 0.751       | 0.818       | 0.705    | 0.676 | 0.876 |
| SVM (radial basis function)  | 0.849 | 0.795    | 0.779       | 0.802       | 0.714    | 0.674 | 0.888 |
| MLP                          | 0.850 | 0.789    | 0.768       | 0.799       | 0.700    | 0.655 | 0.883 |
| LDA                          | 0.838 | 0.793    | 0.746       | 0.815       | 0.706    | 0.692 | 0.872 |
| LGBM                         | 0.822 | 0.777    | 0.748       | 0.789       | 0.683    | 0.651 | 0.876 |
| Voting                       | 0.848 | 0.787    | 0.785       | 0.789       | 0.708    | 0.660 | 0.889 |
| <b>External cohort score</b> |       |          |             |             |          |       |       |
| XGBoost                      | 0.816 | 0.758    | 0.828       | 0.697       | 0.762    | 0.706 | 0.821 |
| Random forest                | 0.807 | 0.742    | 0.724       | 0.758       | 0.724    | 0.724 | 0.758 |
| Logistic regression          | 0.806 | 0.726    | 0.862       | 0.606       | 0.746    | 0.658 | 0.833 |
| SVM (Linear)                 | 0.809 | 0.710    | 0.828       | 0.606       | 0.727    | 0.649 | 0.800 |
| SVM (radial basis function)  | 0.794 | 0.774    | 0.552       | 0.970       | 0.696    | 0.941 | 0.711 |
| MLP                          | 0.834 | 0.758    | 0.759       | 0.758       | 0.746    | 0.733 | 0.781 |
| LDA                          | 0.828 | 0.742    | 0.897       | 0.606       | 0.765    | 0.667 | 0.870 |
| LGBM                         | 0.779 | 0.710    | 0.655       | 0.758       | 0.679    | 0.704 | 0.714 |
| Voting                       | 0.806 | 0.758    | 0.552       | 0.939       | 0.681    | 0.889 | 0.705 |

AUC (area under the receiver operating characteristic curve), LDA (linear discriminant analysis), LGBM (light gradient boosting machine), MLP (multilayer perceptron), NPV (negative predictive values), PPV (positive predictive values), SVM (support vector machine), XGBoost (eXtreme Gradient Boosting)

**Supplementary Table S4. Prehospital diagnostic algorithms for ST-segment elevation myocardial infarction using 17 features**

| Models                       | AUC   | Accuracy | Sensitivity | Specificity | F1-score | PPV   | NPV   |
|------------------------------|-------|----------|-------------|-------------|----------|-------|-------|
| <b>Training score</b>        |       |          |             |             |          |       |       |
| XGBoost                      | 0.891 | 0.818    | 0.818       | 0.822       | 0.723    | 0.650 | 0.919 |
| Logistic regression          | 0.878 | 0.793    | 0.793       | 0.816       | 0.706    | 0.642 | 0.909 |
| Random forest                | 0.916 | 0.843    | 0.843       | 0.857       | 0.767    | 0.704 | 0.932 |
| SVM (Linear)                 | 0.878 | 0.789    | 0.789       | 0.819       | 0.706    | 0.645 | 0.908 |
| SVM (radial basis function)  | 0.876 | 0.810    | 0.810       | 0.807       | 0.708    | 0.632 | 0.914 |
| MLP                          | 0.879 | 0.774    | 0.774       | 0.835       | 0.709    | 0.656 | 0.902 |
| LDA                          | 0.874 | 0.787    | 0.787       | 0.803       | 0.692    | 0.620 | 0.904 |
| LGBM                         | 0.907 | 0.839    | 0.839       | 0.830       | 0.742    | 0.665 | 0.928 |
| Voting                       | 0.880 | 0.813    | 0.813       | 0.795       | 0.700    | 0.616 | 0.914 |
| <b>Test score</b>            |       |          |             |             |          |       |       |
| XGBoost                      | 0.850 | 0.755    | 0.755       | 0.803       | 0.676    | 0.632 | 0.893 |
| Random forest                | 0.857 | 0.742    | 0.742       | 0.838       | 0.698    | 0.668 | 0.889 |
| Logistic regression          | 0.852 | 0.724    | 0.724       | 0.844       | 0.688    | 0.675 | 0.886 |
| SVM (Linear)                 | 0.855 | 0.736    | 0.736       | 0.843       | 0.698    | 0.683 | 0.891 |
| SVM (radial basis function)  | 0.851 | 0.736    | 0.736       | 0.818       | 0.679    | 0.650 | 0.887 |
| MLP                          | 0.854 | 0.768    | 0.768       | 0.806       | 0.685    | 0.626 | 0.897 |
| LDA                          | 0.862 | 0.761    | 0.761       | 0.803       | 0.682    | 0.641 | 0.895 |
| LGBM                         | 0.841 | 0.698    | 0.698       | 0.846       | 0.672    | 0.674 | 0.877 |
| Voting                       | 0.856 | 0.755    | 0.755       | 0.813       | 0.684    | 0.642 | 0.893 |
| <b>External cohort score</b> |       |          |             |             |          |       |       |
| XGBoost                      | 0.784 | 0.739    | 0.739       | 0.692       | 0.654    | 0.586 | 0.818 |
| Random forest                | 0.785 | 0.783    | 0.783       | 0.718       | 0.692    | 0.621 | 0.848 |
| Logistic regression          | 0.814 | 0.565    | 0.565       | 0.949       | 0.684    | 0.867 | 0.787 |
| SVM (Linear)                 | 0.805 | 0.565    | 0.565       | 0.923       | 0.667    | 0.813 | 0.783 |
| SVM (radial basis function)  | 0.781 | 0.565    | 0.565       | 0.897       | 0.650    | 0.765 | 0.778 |
| MLP                          | 0.804 | 0.565    | 0.565       | 0.949       | 0.684    | 0.867 | 0.787 |
| LDA                          | 0.823 | 0.783    | 0.783       | 0.718       | 0.692    | 0.621 | 0.848 |
| LGBM                         | 0.794 | 0.696    | 0.696       | 0.718       | 0.640    | 0.593 | 0.800 |
| Voting                       | 0.821 | 0.783    | 0.783       | 0.718       | 0.692    | 0.621 | 0.848 |

AUC (area under the receiver operating characteristic curve), LDA (linear discriminant analysis), LGBM (light gradient boosting machine), MLP (multilayer perceptron), NPV (negative predictive values), PPV (positive predictive values), SVM (support vector machine), XGBoost (eXtreme Gradient Boosting)

### Supplementary Table S5. Collected features

|                                             |                                             |
|---------------------------------------------|---------------------------------------------|
| Age                                         | Symptoms                                    |
| Sex                                         | 1. Cold hands                               |
|                                             | 2. Hand moistening                          |
| Past medical history                        | 3. Dyspnea                                  |
| Diabetes mellitus                           | 4. Palpitations                             |
| Hypertension                                | 5. Throbbing pain                           |
| Dyslipidemia                                | 6. Sharp/stabbing pain                      |
| Stable angina                               | 7. Positional chest pain                    |
| Old myocardial infarction                   | 8. Reproduction of chest pain by palpation  |
| Prior PCI                                   | 9. Chest pain with breathing or cough       |
| Prior CABG                                  | 10. Pressing pain                           |
| Intracranial hemorrhage                     | 11. Nausea or vomiting                      |
| Cerebral infarction                         | 12. Cold sweat                              |
| Prior antiplatelet or anticoagulant therapy | 13. Radiation to jaw or shoulder            |
|                                             | 14. Similarity to previous ischemic episode |
| Vital signs                                 | 15. Chest pain aggravated by walk           |
| Heart rate                                  | 16. Worsening pain                          |
| Systolic blood pressure                     | 17. Pain at rest                            |
| Diastolic blood pressure                    | 18. Persistent pain                         |
| Body temperature                            | 19. Recurrent pain with 24 hours            |
| Blood oxygen saturation                     | 20. Chronic pain                            |
| Respiratory rate                            | 21. Pain severity                           |
| Japan Coma Scale                            |                                             |
| Oxygen therapy                              |                                             |
| ECG monitoring                              |                                             |
| ST elevation                                |                                             |
| ST depression                               |                                             |
| ST change                                   |                                             |
| Arrhythmia                                  |                                             |

CABG (coronary artery bypass grafting), ECG (electrocardiogram), PCI (percutaneous coronary intervention)



**Supplementary Table S6. Interviews of symptoms**

| Element                                     | Question                                                                                                     |
|---------------------------------------------|--------------------------------------------------------------------------------------------------------------|
| 3. Dyspnea                                  | Do you have difficulty in breathing?                                                                         |
| 4. Palpitations                             | Do you have palpitations?                                                                                    |
| 5. Throbbing pain                           | Do you describe the pain as throbbing?                                                                       |
| 6. Sharp/stabbing pain                      | Do you describe the pain as sharp or stabbing?                                                               |
| 7. Positional chest pain                    | Does the pain get better or worse when you change your body position?                                        |
| 8. Reproduction of chest pain by palpation  | If I touch your chest wall, does it reproduce the pain?                                                      |
| 9. Chest pain with breathing or cough       | Does the pain get worse when you take a deep breath or cough?                                                |
| 10. Pressing pain                           | Do you describe the pain as heavy or pressing?                                                               |
| 11. Nausea or vomiting                      | Do you have nausea? Did you vomit?                                                                           |
| 12. Cold sweat                              | Do you have cold sweat?                                                                                      |
| 13. Pain radiating to jaw or shoulder       | Does your pain radiate to your jaw or shoulder?                                                              |
| 14. Similarity to previous ischemic episode | If you have experienced a heart attack or angina in the past, is this pain similar to the pain you had then? |
| 15. Chest pain aggravated by walk           | Does the pain get worse when you walk?                                                                       |
| 16. Worsening pain                          | Is the pain getting worse since it began?                                                                    |
| 17. Pain at rest                            | Do you have the pain at rest?                                                                                |
| 18. Persistent pain                         | Is the pain still present?                                                                                   |
| 19. Recurrent pain with 24 hours            | Have you had the pain more than once in the past 24 hours?                                                   |
| 20. Chronic pain                            | Do you have the pain for more than 6 months?                                                                 |
| 21. Pain severity                           | If 10 is the most severe pain you have ever had, on the 10-point scale, how severe is this pain?             |

**Supplementary Figure S1. Relationship between the number of features and accuracy, sensitivity, specificity, F1-score, positive predictive values and negative predictive values for the prediction algorithm**

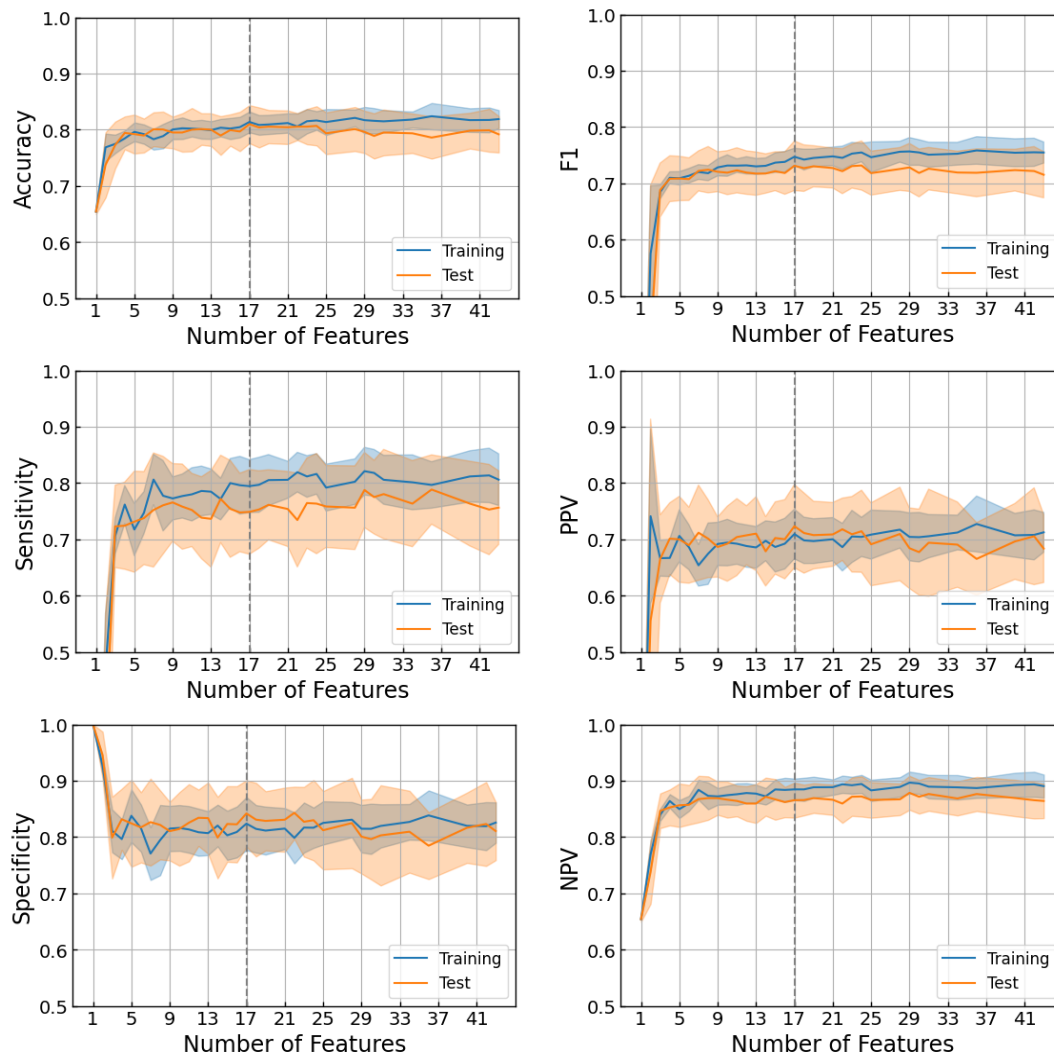

The line plots depict sequential changes in the accuracy, sensitivity, specificity, F1-score, positive predictive values, and negative predictive values with the number of features for the prediction algorithm (a) in the training score (blue) and (b) the test score (yellow). The dotted vertical line indicates  $n=17$ . These 17 features produced the highest average accuracy (training score 0.814, test score 0.810) and positive predictive values (training score 0.709, test score 0.723) in the test score. The error bars indicate 95% confidence intervals.

NPV (negative predictive values), PPV (positive predictive values)

Supplementary Figure S2. Comparison of test score of area under the receiver operating characteristic curve using XGBoost with 17 and 43 features

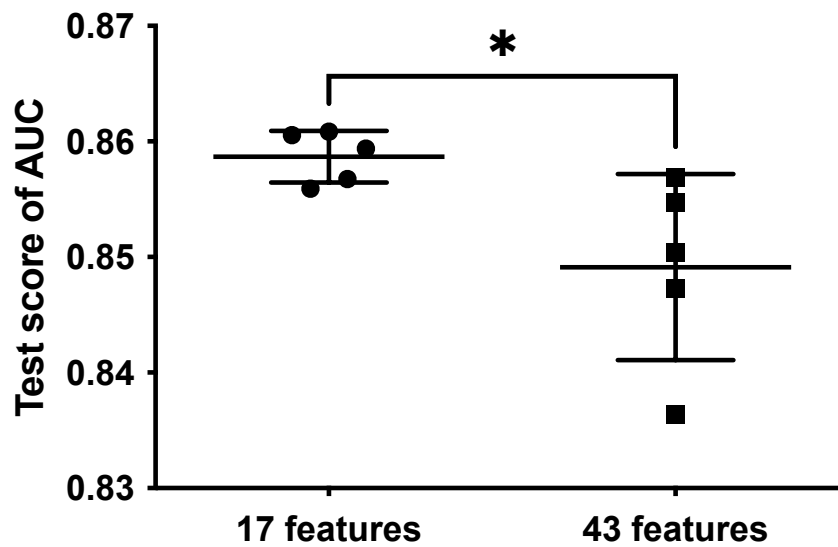

The average test score of the AUC were calculated for each session. Then, the mean test score was compared between XGBoost with 17 and 43 features. XGBoost using 17 features showed a significantly higher test score (0.859 [95% CI 0.842–0.876]) than that using 43 features (0.849 [95% CI 0.772–0.812]) ( $P = 0.034$ ). \*:  $P = 0.034$  using an unpaired  $t$ -test. AUC (area under the receiver operating characteristic curve), XGBoost (eXtreme Gradient Boosting), CI (confidence interval).

**Supplementary Figure S3. SHAP value of the prehospital diagnostic algorithm for acute coronary syndrome using 43 features**

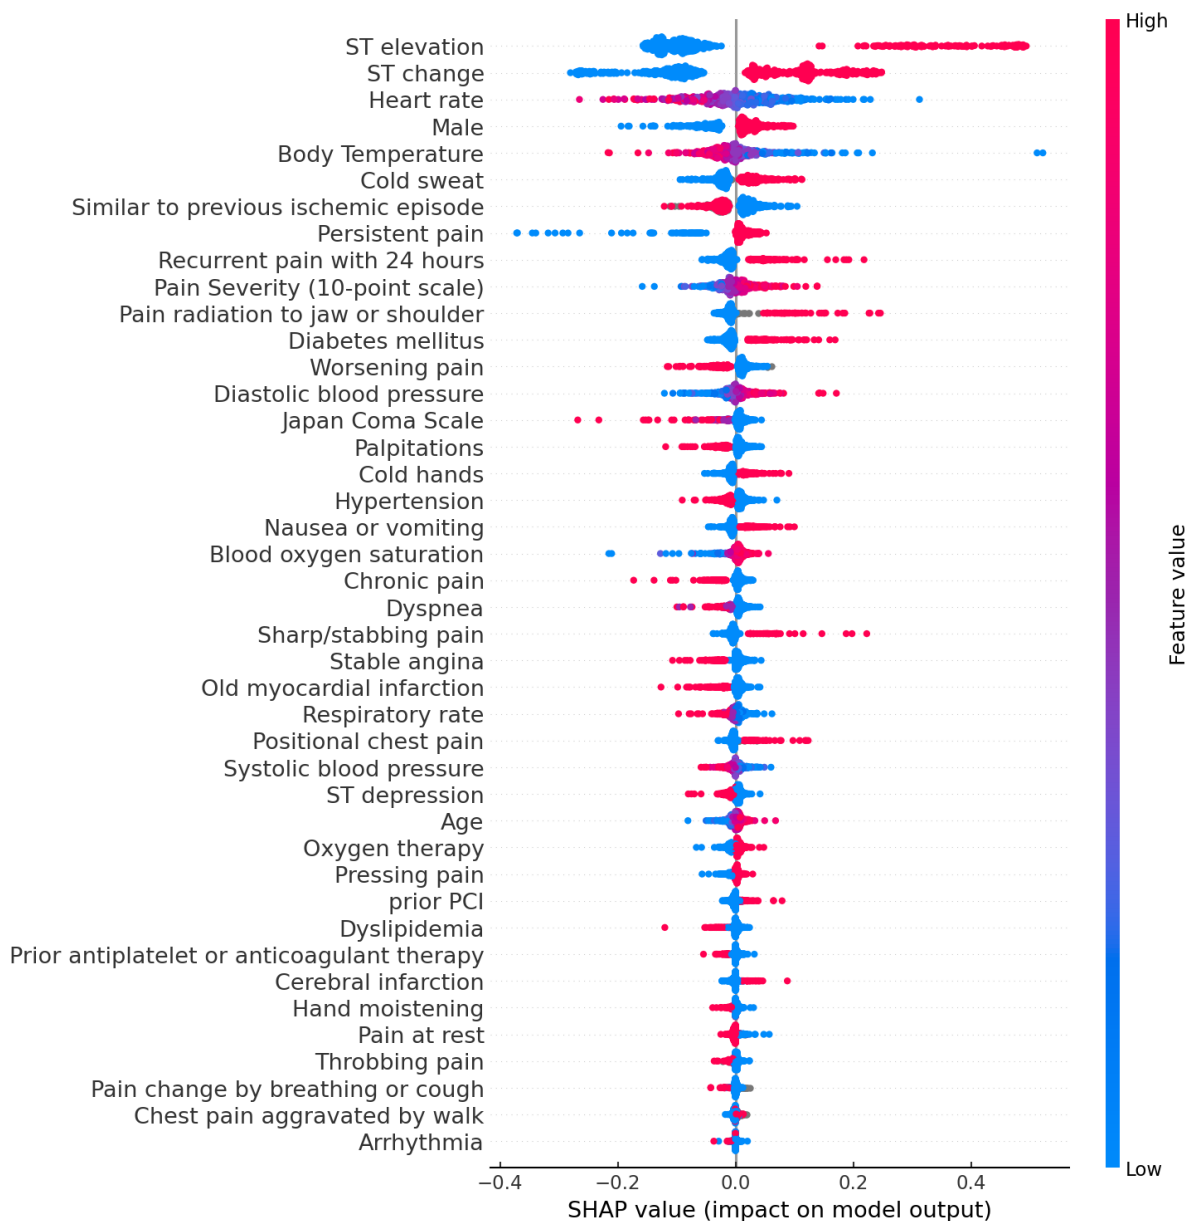

The impact of the features on the model output is expressed as the SHAP value calculated with the linear discriminant analysis. The features are placed in descending order according to their importance. The association between the feature value and SHAP value indicates a positive or negative impact of the predictors. The extent of this value is depicted in red (high) or blue (low). SHAP (SHapley Additive exPlanation).

### Supplementary Figure S4. Study flowchart

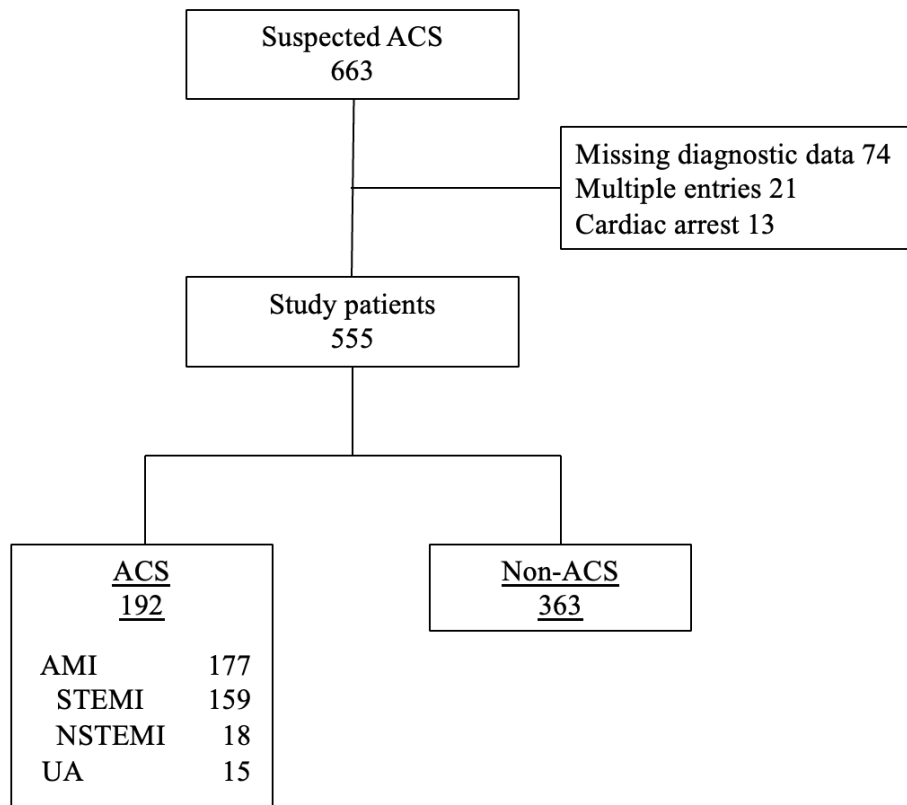

ACS (acute coronary syndrome), AMI (acute myocardial infarction), NSTEMI (non- ST-segment elevation myocardial infarction), STEMI (ST-segment elevation myocardial infarction), UA (unstable angina).

## **Supplementary Note S1. Contribution of timing and meteorological conditions to the onset of acute coronary syndrome**

The onset timing (hours, weekday) and meteorological conditions on the onset day were also considered as important feature candidates as suggested in previous studies<sup>1-3</sup>. However, none of these features were selected by our feature selection method or by another method based on statistical correlation. This might be due to an insufficient number of samples compared to the wide range of hours and weekdays in our data; therefore, we leave this for future analysis.

## **Supplementary Note S2. Model evaluation strategy**

We used nested cross-validation (CV) with 5-outer folds and 5-inner folds to fine-tune the model parameters and to select the best combination of the explainable features, because the nested CV procedure produces robust and unbiased performance estimates regardless of sample size<sup>4,5</sup>.

Nested CV includes a double loop, an outer loop, and an inner loop to avoid data leakage. In the nested CV, the training cohort was split into five subsets, leaving one subset for model evaluation and the remaining four subsets for model training (outer loop). Each outer training set was further split into five subsets, applying one subset for model selection and the remaining four subsets for training (inner loop). In the inner loop, five models were developed using the inner training set and evaluated using the inner validation set, and the best-performing model was selected. Finally, the selected model was evaluated using the outer validation set, and the best model and parameters were selected.

The number of folds was determined to be balanced between maximizing the number of iterations and maintaining the number of samples in a fold not too small.

## Supplementary References

- 1 Tofler, G. H. *et al.* Triggers and Timing of Acute Coronary Syndromes. *Am J Cardiol* **119**, 1560-1565 (2017).
- 2 Willich, S. N. *et al.* Weekly variation of acute myocardial infarction. Increased Monday risk in the working population. *Circulation* **90**, 87-93 (1994).
- 3 Ezekowitz, J. A. *et al.* The relationship between meteorological conditions and index acute coronary events in a global clinical trial. *Int J Cardiol* **168**, 2315-2321 (2013).
- 4 Varma, S. & Simon, R. Bias in error estimation when using cross-validation for model selection. *BMC Bioinformatics* **7**, 91 (2006).
- 5 Vabalas, A., Gowen, E., Poliakoff, E. & Casson, A. J. Machine learning algorithm validation with a limited sample size. *PLoS One* **14**, e0224365 (2019).
